# Supplementary material for: The problem with defining foreign birth as a risk factor in tuberculosis epidemiology studies
Source: PubMed Central journal article supplement (PMC6490926; doi:10.1371/journal.pone.0216271), 2019-04-30
Supplement: pone.0216271.s001.pdf [file pone.0216271.s001.pdf]

**S1 Table.** Characteristics of persons arriving in Canada  $\geq 10$  years prior to tuberculosis diagnosis, categorized by birthplace incidence and genotype clustering status.

| Characteristics                   | High-Incidence   |                  | Medium-to-low Incidence |                  |
|-----------------------------------|------------------|------------------|-------------------------|------------------|
|                                   | Clustered        | Unique           | Clustered               | Unique           |
| Total — <i>n</i>                  | 249              | 606              | 22                      | 59               |
| Male — <i>n</i> (%)               | 146 (58.6)       | 350 (57.8)       | 17 (77.3)               | 31 (52.5)        |
| Age at immigration — median (IQR) | 39 (26–56)       | 42 (28–57)       | 9 (4–26)                | 30 (21–40)       |
| Age at diagnosis — median (IQR)   | 63 (49–77)       | 68 (50–79)       | 53 (46–60)              | 75 (63–82)       |
| Year of arrival — median (IQR)    | 1991 (1982–1996) | 1990 (1982–1994) | 1966 (1957–1988)        | 1968 (1957–1982) |
| Region of birth                   |                  |                  |                         |                  |
| Asia                              | 237 (95.2)       | 575 (94.9)       | 1 (4.5)                 | 9 (15.3)         |
| United States/Europe*             | 0 (0.0)          | 0 (0.0)          | 15 (68.2)               | 31 (52.5)        |
| Other                             | 12 (4.8)         | 31 (5.1)         | 6 (27.3)                | 19 (32.2)        |

Abbreviations: IQR, interquartile range.

\*Eastern Europe excluded.
